# Supplementary material for: Ein strukturierter Versorgungspfad von der Pädiatrie in die Erwachsenenmedizin für Jugendliche und junge Erwachsene mit einer seltenen Erkrankung
Source: Springer Nature journal article supplement (doi:10.1007/s00112-020-00929-5), 2020-05-25
Supplement: MOESM1 [file 18010544]

**Fragebogen zur Gesundheitskompetenz von Jugendlichen und jungen Erwachsenen mit seltener Erkrankung**

|                                                                                                                                                                                                                                                                                                                                                                                                                                                                                                                                                                                    |                                                                                                                                                                                                                                                                                                                                                                                                                                                                                                                                                                                                  |
|------------------------------------------------------------------------------------------------------------------------------------------------------------------------------------------------------------------------------------------------------------------------------------------------------------------------------------------------------------------------------------------------------------------------------------------------------------------------------------------------------------------------------------------------------------------------------------|--------------------------------------------------------------------------------------------------------------------------------------------------------------------------------------------------------------------------------------------------------------------------------------------------------------------------------------------------------------------------------------------------------------------------------------------------------------------------------------------------------------------------------------------------------------------------------------------------|
| Liebe(r) _____<br><br>Du wirst derzeit in einer Sprechstunde der Kinder- und Jugendmedizin betreut. In einiger Zeit steht für Dich der Wechsel (Transition) in die Erwachsenenmedizin an. Zur Vorbereitung möchten wir Dich bitten, diesen Fragebogen auszufüllen und in der Sprechstunde mit uns zu besprechen. Dieser Fragebogen ist für Menschen mit ganz unterschiedlichen Krankheiten gemacht und enthält daher auch Fragen, die auf Deine Krankheit vielleicht nicht zutreffen. In diesen Fällen kreuze bitte das Feld „ <b>Spielt für meine Krankheit keine Rolle</b> “ an. | Liebe(r) Frau/Herr _____<br><br>Sie werden derzeit in einer Sprechstunde der Kinder- und Jugendmedizin betreut. In einiger Zeit steht für Sie der Wechsel (Transition) in die Erwachsenenmedizin an. Zur Vorbereitung möchten wir Sie bitten, diesen Fragebogen auszufüllen und in der Sprechstunde mit uns zu besprechen. Dieser Fragebogen ist für Menschen mit ganz unterschiedlichen Krankheiten gemacht und enthält daher auch Fragen, die auf Ihre Krankheit vielleicht nicht zutreffen. In diesen Fällen kreuzen Sie bitte das Feld „ <b>Spielt für meine Krankheit keine Rolle</b> “ an. |
|------------------------------------------------------------------------------------------------------------------------------------------------------------------------------------------------------------------------------------------------------------------------------------------------------------------------------------------------------------------------------------------------------------------------------------------------------------------------------------------------------------------------------------------------------------------------------------|--------------------------------------------------------------------------------------------------------------------------------------------------------------------------------------------------------------------------------------------------------------------------------------------------------------------------------------------------------------------------------------------------------------------------------------------------------------------------------------------------------------------------------------------------------------------------------------------------|

Name und Vorname: \_\_\_\_\_

Geburtsdatum: \_\_\_\_\_

Datum: \_\_\_\_\_

**Von den folgenden Aussagen trifft am besten auf mich zu**

|                                                                                                                          | stimmt | stimmt zum Teil | stimmt nicht | Spielt für meine Krankheit keine Rolle |
|--------------------------------------------------------------------------------------------------------------------------|--------|-----------------|--------------|----------------------------------------|
| <b>A. Wissen zur Erkrankung</b>                                                                                          |        |                 |              |                                        |
| 1. Ich weiß, wie meine Erkrankung heißt und kann sie anderen erklären.                                                   |        |                 |              |                                        |
| 2. Ich weiß, welche Untersuchungen durchgeführt werden und warum.                                                        |        |                 |              |                                        |
| 3. Ich weiß, welche Symptome und Komplikationen im Verlauf meiner Erkrankung auftreten können.                           |        |                 |              |                                        |
| 4. Ich erkenne Anzeichen einer Krankheitsverschlechterung.                                                               |        |                 |              |                                        |
| 5. Ich kenne die Grundlagen der Vererbung meiner Erkrankung.                                                             |        |                 |              |                                        |
| 6. Ich kenne den Zusammenhang zwischen meiner Erkrankung und Sexualität und Verhütung.                                   |        |                 |              |                                        |
| 7. Ich kenne die besonderen Auswirkungen von Tabak, Alkohol und anderen Drogen auf meine Erkrankung und ihre Behandlung. |        |                 |              |                                        |
| <b>B. Therapie und Behandlung</b>                                                                                        |        |                 |              |                                        |
| 8. Ich weiß, was zu meiner Behandlung gehört.                                                                            |        |                 |              |                                        |
| 9. Ich kenne die Namen meiner Medikamente.                                                                               |        |                 |              |                                        |
| 10. Ich kenne die Wirkungen und Nebenwirkungen meiner Behandlung/Medikamente.                                            |        |                 |              |                                        |
| 11. Ich nehme meine Medikamente <b>selbständig</b> ein, bzw. führe meine Behandlung <b>selbständig</b> durch.            |        |                 |              |                                        |
| 12. Ich führe meine Behandlung <b>regelmäßig</b> durch bzw. nehme meine Medikamente <b>regelmäßig</b> ein.               |        |                 |              |                                        |
| 13. Ich kann meine Medikamente/Behandlung an besondere Situationen (Belastungen, Infekte, Freizeit) anpassen.            |        |                 |              |                                        |
| 14. Ich weiß, wodurch die Wirkung meiner Medikamente beeinflusst werden kann.                                            |        |                 |              |                                        |
| 15. Ich weiß, was im Falle eines operativen Eingriffs zu beachten ist.                                                   |        |                 |              |                                        |
| 16. Ich habe einen Notfallausweis und trage ihn immer bei mir.                                                           |        |                 |              |                                        |

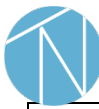

|                                                                                                                                                      | stimmt | stimmt<br>zum Teil | stimmt<br>nicht | Spielt für<br>meine<br>Krankheit<br>keine Rolle |
|------------------------------------------------------------------------------------------------------------------------------------------------------|--------|--------------------|-----------------|-------------------------------------------------|
| <b>C. Unterstützung und Informationen</b>                                                                                                            |        |                    |                 |                                                 |
| 17. Ich erhalte von meinem Partner/Partnerin, meinen Eltern oder anderen erwachsenen Vertrauenspersonen ausreichend Unterstützung.                   |        |                    |                 |                                                 |
| 18. In meiner Umgebung (Freundes- oder Familienkreis) gibt es eine erwachsene Person, die sich gut mit meiner Krankheit und der Behandlung auskennt. |        |                    |                 |                                                 |
| 19. Ich fühle mich über Unterstützungsangebote ausreichend informiert.                                                                               |        |                    |                 |                                                 |
| 20. Ich weiß, wie ich mit Menschen mit der gleichen Krankheit Kontakt aufnehmen kann.                                                                |        |                    |                 |                                                 |
| 21. Meine Krankheit bzw. deren Behandlung stellt für mich eine finanzielle Belastung dar.                                                            |        |                    |                 |                                                 |
| <b>D. Pläne zur Zukunft und zum Beruf</b>                                                                                                            |        |                    |                 |                                                 |
| 22. Ich weiß, was ich bei der Vorbereitung meiner Reisen beachten muss.                                                                              |        |                    |                 |                                                 |
| 23. Ich weiß, was ich hinsichtlich meiner Erkrankung/Behandlung beim Führerscheinwerb und im Straßenverkehr beachten muss.                           |        |                    |                 |                                                 |
| 24. Ich weiß, was mein Lehrer/ Arbeitgeber über meine Erkrankung wissen muss.                                                                        |        |                    |                 |                                                 |
| 25. Ich kenne die Besonderheiten meiner Erkrankung, die ich bei der Berufswahl berücksichtigen muss.                                                 |        |                    |                 |                                                 |
| 26. Ich weiß, was ich bei meiner Erkrankung/Behandlung für den Fall einer Schwangerschaft und Geburt beachten muss.                                  |        |                    |                 |                                                 |
| <b>E. Klinikkontakte</b>                                                                                                                             |        |                    |                 |                                                 |
| 27. Ich spreche in der Sprechstunde (auch) alleine mit meinem Arzt oder suche mir selbst eine Begleitung.                                            |        |                    |                 |                                                 |
| 28. Ich kann meine Arzttermine selbst vereinbaren.                                                                                                   |        |                    |                 |                                                 |
| 29. Ich weiß, wie ich meine Behandler (z.B. Ärzte, Diätberatung) erreichen kann.                                                                     |        |                    |                 |                                                 |
| 30. Ich kann mich selbst um Folgerezepte oder Verordnungen kümmern.                                                                                  |        |                    |                 |                                                 |

| <b>F. Ich wünsche mir vom Behandlungsteam...</b>                                                                                                                       | <b>Bitte ankreuzen</b> |
|------------------------------------------------------------------------------------------------------------------------------------------------------------------------|------------------------|
| I. Weitere Informationen über meine Erkrankung.                                                                                                                        |                        |
| II. Unterstützung bei Fragen zu Schule, Ausbildung, Studium und Beruf.                                                                                                 |                        |
| III. Informationen über den Umgang mit Behörden und was sich mit Erreichen der Volljährigkeit (18 Jahre) rechtlich ändert (z. B. Krankenkasse, Ämter, Versicherungen). |                        |
| IV. Die Organisation einer psychologischen Beratung.                                                                                                                   |                        |

**Anmerkungen/Fragen/Wünsche:**


---



---

**Vielen Dank für Ihre Mitarbeit.**

**Literatur:**

- Findorff, J, Mütter, S, von Moers, A, Nolting, H-D, Burger, W (2016): *Das Berliner Transitionsprogramm*. Berlin, Boston, De Gruyter
- Minden, K, Berlin; Schalm, S, München; Arbeitskreis Transition der Deutschen Gesellschaft für Rheumatologie e.V., Fragebogen für die Jugendsprechstunde <https://gkjr.de/fuer-mitglieder/informationen-fuer-mitglieder/transitionsunterlagen/>
- The Royal Children's Hospital Melbourne: [http://www.rch.org.au/transition/factsheets\\_and\\_tools/transition\\_checklists/](http://www.rch.org.au/transition/factsheets_and_tools/transition_checklists/)
- Southampton Children's Hospital, Transition to adult care: Ready Steady Go: <http://www.uhs.nhs.uk/OurServices/Childhealth/TransitiontoadultcareReadySteadyGo/Transitiontoadultcare.aspx>
- The Hospital for Sick Children (Sickkids), Toronto: Good2Go Transition program: <http://www.sickkids.ca/Good2Go/For-Youth-and-Families/Transition-Tools/Readiness-Checklists/Index.html>
