# Supplementary material for: Ein strukturierter Versorgungspfad von der Pädiatrie in die Erwachsenenmedizin für Jugendliche und junge Erwachsene mit einer seltenen Erkrankung
Source: Springer Nature journal article supplement (doi:10.1007/s00112-020-00929-5), 2020-05-25
Supplement: MOESM2 [file 18010544]

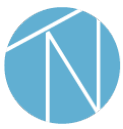

**Proxy Fragebogen zur Gesundheitskompetenz für Eltern/Sorgeberechtigte**

Liebe(r) Frau/Herr \_\_\_\_\_

Ihr Sohn/Ihre Tochter wird derzeit in einer Sprechstunde der Kinder- und Jugendmedizin betreut. In einiger Zeit steht für Sie und Ihr Kind der Wechsel (Transition) in die Erwachsenenmedizin an. Zur Vorbereitung möchten wir Sie bitten, diesen Fragebogen auszufüllen und in der Sprechstunde mit uns zu besprechen. Dieser Fragebogen ist für Menschen mit ganz unterschiedlichen Krankheiten gemacht und enthält daher auch Fragen, die auf die Krankheit Ihrer Tochter/Ihres Sohnes vielleicht nicht zutreffen. In diesen Fällen kreuzen Sie bitte das Feld „**Spielt für die Krankheit keine Rolle**“ an.

Name und Vorname der Patientin/des Patienten: \_\_\_\_\_

Geburtsdatum: \_\_\_\_\_

Fragebogen wurde ausgefüllt von: \_\_\_\_\_

Rechtliche Stellung zur Patientin/zum Patienten: \_\_\_\_\_

Datum: \_\_\_\_\_

**Von den folgenden Aussagen trifft am besten auf mich zu**

|                                                                                                                         | stimmt | stimmt zum Teil | stimmt nicht | Spielt für die Krankheit keine Rolle |
|-------------------------------------------------------------------------------------------------------------------------|--------|-----------------|--------------|--------------------------------------|
| <b>A. Wissen zur Erkrankung</b>                                                                                         |        |                 |              |                                      |
| 1. Ich weiß, wie die Erkrankung meines Kindes heißt und ich kann sie anderen erklären.                                  |        |                 |              |                                      |
| 2. Ich weiß, welche Untersuchungen durchgeführt werden und warum.                                                       |        |                 |              |                                      |
| 3. Ich weiß, welche Symptome und Komplikationen im Verlauf der Erkrankung auftreten können.                             |        |                 |              |                                      |
| 4. Ich erkenne Anzeichen einer Krankheitsverschlechterung.                                                              |        |                 |              |                                      |
| 5. Ich kenne die Grundlagen der Vererbung der Erkrankung.                                                               |        |                 |              |                                      |
| 6. Ich kenne den Zusammenhang zwischen der Erkrankung und Sexualität und Verhütung.                                     |        |                 |              |                                      |
| 7. Ich kenne die besonderen Auswirkungen von Tabak, Alkohol und anderen Drogen auf die Erkrankung und ihre Behandlung.  |        |                 |              |                                      |
| <b>B. Therapie und Behandlung</b>                                                                                       |        |                 |              |                                      |
| 8. Ich weiß, was zur Behandlung gehört.                                                                                 |        |                 |              |                                      |
| 9. Ich kenne die Namen der Medikamente.                                                                                 |        |                 |              |                                      |
| 10. Ich kenne die Wirkungen und Nebenwirkungen der Behandlung/Medikamente.                                              |        |                 |              |                                      |
| 11. Ich verabreiche meinem Kind seine Medikamente <b>selbst</b> , bzw. führe seine Behandlung <b>selbständig</b> durch. |        |                 |              |                                      |
| 12. Ich führe die Behandlung <b>regelmäßig</b> durch bzw. verabreiche die Medikamente <b>regelmäßig</b> .               |        |                 |              |                                      |
| 13. Ich kann die Medikamente/Behandlung an besondere Situationen (Belastungen, Infekte, Freizeit) anpassen.             |        |                 |              |                                      |
| 14. Ich weiß, wodurch die Wirkung der Medikamente beeinflusst werden kann.                                              |        |                 |              |                                      |
| 15. Ich weiß, was im Falle eines operativen Eingriffs zu beachten ist.                                                  |        |                 |              |                                      |
| 16. Mein Kind hat einen Notfallausweis und trägt ihn immer bei sich.                                                    |        |                 |              |                                      |

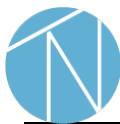

|                                                                                                                                                   | stimmt | stimmt<br>zum Teil | stimmt<br>nicht | Spielt für<br>die<br>Krankheit<br>keine Rolle |
|---------------------------------------------------------------------------------------------------------------------------------------------------|--------|--------------------|-----------------|-----------------------------------------------|
| <b>C. Unterstützung und Informationen</b>                                                                                                         |        |                    |                 |                                               |
| 17. Ich erhalte von meiner Familie oder anderen erwachsenen Vertrauenspersonen ausreichend Unterstützung.                                         |        |                    |                 |                                               |
| 18. In meiner Umgebung (Freundes- oder Familienkreis) gibt es eine erwachsene Person, die sich gut mit der Krankheit und der Behandlung auskennt. |        |                    |                 |                                               |
| 19. Ich fühle mich über Unterstützungsangebote ausreichend informiert.                                                                            |        |                    |                 |                                               |
| 20. Ich weiß, wie ich mit Menschen mit der gleichen Krankheit bzw. deren Familien Kontakt aufnehmen kann.                                         |        |                    |                 |                                               |
| 21. Die Krankheit bzw. deren Behandlung stellt für mich eine finanzielle Belastung dar.                                                           |        |                    |                 |                                               |
| <b>D. Pläne zur Zukunft und zum Beruf</b>                                                                                                         |        |                    |                 |                                               |
| 22. Ich weiß, was ich bei der Vorbereitung von Reisen beachten muss.                                                                              |        |                    |                 |                                               |
| 23. Ich weiß, was Lehrer/ Arbeitgeber über die Erkrankung wissen müssen.                                                                          |        |                    |                 |                                               |
| 24. Ich kenne die Besonderheiten der Erkrankung, die bei der Berufswahl berücksichtigt werden müssen.                                             |        |                    |                 |                                               |
| 25. Ich weiß, was bei der Erkrankung/Behandlung für den Fall einer Schwangerschaft und Geburt beachtet werden muss.                               |        |                    |                 |                                               |
| <b>E. Klinikkontakte</b>                                                                                                                          |        |                    |                 |                                               |
| 26. Mein Kind kann in der Sprechstunde nicht alleine mit dem Arzt sprechen und braucht deshalb meine Begleitung.                                  |        |                    |                 |                                               |
| 27. Ich kann die Arzttermine für mein Kind selbst vereinbaren.                                                                                    |        |                    |                 |                                               |
| 28. Ich weiß, wie ich die Behandler meines Kindes (z.B. Ärzte, Diätberatung) erreichen kann.                                                      |        |                    |                 |                                               |
| 29. Ich kann mich selbst um Folgerezepte oder Verordnungen kümmern.                                                                               |        |                    |                 |                                               |

| <b>F. Ich wünsche mir vom Behandlungsteam...</b>                                                                                                                       | <b>Bitte ankreuzen</b> |
|------------------------------------------------------------------------------------------------------------------------------------------------------------------------|------------------------|
| I. Weitere Informationen über die Erkrankung.                                                                                                                          |                        |
| II. Unterstützung bei Fragen zu Schule, Ausbildung, Studium und Beruf.                                                                                                 |                        |
| III. Informationen über den Umgang mit Behörden und was sich mit Erreichen der Volljährigkeit (18 Jahre) rechtlich ändert (z. B. Krankenkasse, Ämter, Versicherungen). |                        |
| IV. Die Organisation einer psychologischen Beratung für meine Tochter/meinen Sohn.                                                                                     |                        |
| V. Die Organisation einer psychologischen Beratung für mich selbst.                                                                                                    |                        |

**Anmerkungen/Fragen/Wünsche:**

---



---

**Vielen Dank für Ihre Mitarbeit.**

**Literatur:**

- Findorff, J, Müther, S, von Moers, A, Nolting, H-D, Burger, W (2016): *Das Berliner Transitionsprogramm*. Berlin, Boston, De Gruyter
- Minden, K, Berlin; Schalm, S, München; Arbeitskreis Transition der Deutschen Gesellschaft für Rheumatologie e.V., Fragebogen für die Jugendsprechstunde <https://gkjr.de/fuer-mitglieder/informationen-fuer-mitglieder/transitionsunterlagen/>
- The Royal Children's Hospital Melbourne:
- Southampton Children's Hospital, Transition to adult care: Ready Steady Go: <http://www.uhs.nhs.uk/OurServices/Childhealth/TransitiontoadultcareReadySteadyGo/Transitiontoadultcare.aspx>
- The Hospital for Sick Children (Sickkids), Toronto: Good2Go Transition program: <http://www.sickkids.ca/Good2Go/For-Youth-and-Families/Transition-Tools/Readiness-Checklists/Index.html>
