# Supplementary material for: Ein strukturierter Versorgungspfad von der Pädiatrie in die Erwachsenenmedizin für Jugendliche und junge Erwachsene mit einer seltenen Erkrankung
Source: Springer Nature journal article supplement (doi:10.1007/s00112-020-00929-5), 2020-05-25
Supplement: MOESM3 [file 18010544]

Datum:

## A. Angaben Patient

Name:

Vorname:

Geburtsdatum (tt/mm/jjjj):

Alter:

Geschlecht:

Straße:

PLZ:

Ort:

## A1. Diagnosen

Diagnose Grunderkrankung einschließlich Unterform, z. B. klassische vs. milde Form (Akronyme und Abkürzungen erläutern)

ICD:

ORPHA:

Weitere Diagnosen, Komorbiditäten, Sekundärfolgen (Akronyme und Abkürzungen erläutern)

## A2. Betreuende Einrichtung Pädiatrie

Anschrift einschließlich Bezeichnung Spezialambulanz:

in Behandlung seit (tt/mm/jjjj): Verantwortliche(r) /Ärztin/Arzt:

### **A3. Weiterbehandelnde Einrichtung**

Anschrift einschließlich Bezeichnung Spezialambulanz:

Verantwortliche(r) /Ärztin/Arzt:

### **A4. Weitere betreuende Fachrichtungen und Ansprechpartner (Pädiatrie und Weiterbehandler)**

Anschrift 1 einschließlich Bezeichnung Spezialambulanz:

Verantwortliche(r) /Ärztin/Arzt:

Anschrift 2 einschließlich Bezeichnung Spezialambulanz:

Verantwortliche(r) /Ärztin/Arzt:

Anschrift 3 einschließlich Bezeichnung Spezialambulanz:

Verantwortliche(r) /Ärztin/Arzt:

Anschrift 4 einschließlich Bezeichnung Spezialambulanz:

Verantwortliche(r) /Ärztin/Arzt:

Weitere Eingabemöglichkeiten zu A4 finden sich auf der Seite 9.

## A5. Muttersprache, Sprachen

Sind ausreichende Deutschkenntnisse zum Verständnis  
behandlungsrelevanter Informationen vorhanden?

Ja

Nein

---

## A6. Familienstand / Kinder

ledig

verheiratet

Kinder:

Ja

Nein

---

## A7. Ist ein Schwerbehindertenausweis vorhanden?

Ja

Nein

Wenn ja, GDB (20-100%):

Merkzeichen:

---

## A8. Betreuung gemäß §1896 BGB

Ja

Nein

Wenn ja, Betreuerin/Betreuer:

---

## A9. (angestrebte) Schulform / Schulabschluss

andere:

## A10. Ausbildung / Studium

andere:

## A11. Erwerbstätig?

Ja

Nein

## A12. Angestrebter Beruf / ausgeübte Tätigkeit

---

## A13. Familienanamnese (ggf. 3-Generationen Stammbaum)

**B1. Diagnosestellung**

Datum (tt/mm/jjjj):

Alter zur DX:

**B2. Erstbehandelnde Einrichtung (falls anders als aktuell)****B3. Relevante Untersuchungsergebnisse bei Diagnose (z. B. Ultraschall, MRT, Röntgen, etc.)**

Datum (tt/mm/jjjj):

Untersuchung / Parameter

Ergebnis

**B4. Weitere relevante Befunde bei Diagnosestellung****B5. Wurde eine genetische Untersuchung durchgeführt?**

Ja

Nein

Wenn ja, wann? (tt/mm/jjjj)

Molekulargenetische Untersuchungen:

Einzelgenanalyse

Panel

Exom

Zytogenetische Untersuchungen:

Chromosomenanalyse

Array CGH

Sonstige

Durchführendes Labor:

Genetische Beratung erfolgt?

Ja

Nein

Anmerkungen:

### C1. Behandlungsbeginn

Datum (tt/mm/jjjj):

### C2. Behandlung mit Datum (tt/mm/jjjj):

| Therapie/Medikament | Wirkstoff | Dosis | Frequenz | Administrationsweg | Kommentar |
|---------------------|-----------|-------|----------|--------------------|-----------|
|---------------------|-----------|-------|----------|--------------------|-----------|

### C3. Im Krankheitsverlauf relevante Untersuchungsbefunde / Auffälligkeiten

| Datum (tt/mm/jjjj) | Untersuchung / Ergebnis | Befund / Auffälligkeit |
|--------------------|-------------------------|------------------------|
|--------------------|-------------------------|------------------------|

### C4. Sonstige Behandlungen

Operationen:

Kur / Reha-Maßnahmen:

### C5. Therapie / Therapieänderung im Verlauf

| Datum (tt/mm/jjjj) | Therapie | Kommentar |
|--------------------|----------|-----------|
|--------------------|----------|-----------|

**D1. Aktuelle Therapie**

Datum (tt/mm/jjjj):

|                     |           |       |          |                    |           |
|---------------------|-----------|-------|----------|--------------------|-----------|
| Therapie/Medikament | Wirkstoff | Dosis | Frequenz | Administrationsweg | Kommentar |
|---------------------|-----------|-------|----------|--------------------|-----------|

**D2. Ist die Diagnose mit einem Risiko für krisenhafte Verschlechterung verbunden?**

Ja                      Nein

**D3. Notfall- / Behandlungsausweis liegt vor?**

Ja                      für Krankheit nicht notwendig

**D4. Psychosoziale Belastungsfaktoren / Besondere Lebensumstände**

**D5. Körperliche Untersuchung**

Körpergröße (m):                      Körpergewicht (kg):                      Kopfumfang (cm):

BMI:                      KOF (m<sup>2</sup>):                      RR: s                      / d                      Herzfrequenz (s/m):

Körperlicher Zustand:                      gut                      reduziert (unten ausführen)

Anmerkungen:

### E1. Gesundheitskompetenz

Ist eine Schulung im Rahmen der Transitionssprechstunden erfolgt?

Ja

Nein

Weiterhin bestehender Beratungs-/ Schulungsbedarf:

Geplante Vorstellung Weiterbehandler: Datum (tt/mm/jjjj)

## F. Empfehlungen

### F1. Empfehlungen zur weiteren Therapie

### F2. Empfehlung zu regelmäßigen Untersuchungen in der Zukunft

Fachrichtung

Untersuchung

Frequenz

### F3. Weitere Empfehlungen (z. B. Mitbehandler, Beratungen)

a) Arztbrief vom:

b) Kopie Wachstumskurve beigefügt:                      Ja                      Nein

c) genetische Befunde:

d) relevante Befunde:

---

Verantwortliche(r) /Ärztin/Arzt:

Kontaktinformation:

Verantwortlich für die Erstellung der Epikrise:

Kontaktinformation:



#### **A4. Weitere betreuende Fachrichtungen und Ansprechpartner (Pädiatrie und Weiterbehandler)**

Anschrift 5 einschließlich Bezeichnung Spezialambulanz:

Verantwortliche(r) /Ärztin/Arzt:

Anschrift 6 einschließlich Bezeichnung Spezialambulanz:

Verantwortliche(r) /Ärztin/Arzt:

Anschrift 7 einschließlich Bezeichnung Spezialambulanz:

Verantwortliche(r) /Ärztin/Arzt:

Anschrift 8 einschließlich Bezeichnung Spezialambulanz:

Verantwortliche(r) /Ärztin/Arzt:

Anschrift 9 einschließlich Bezeichnung Spezialambulanz:

Verantwortliche(r) /Ärztin/Arzt:

Anschrift 10 einschließlich Bezeichnung Spezialambulanz:

Verantwortliche(r) /Ärztin/Arzt:
